# Supplementary material for: Spectral sensitivity in ray-finned fishes: diversity, ecology, and shared descent
Source: Oxford University Press journal article supplement (doi:10.1242/jeb.189761), 2018-01-01
Supplement: jeb189761supp.pdf [file jeb189761supp.pdf]

**Table S1. Meta-table of spectral sensitivity data and ecological assignments of adult ray-finned fishes.** Bolded  $\lambda_{\max}$  values have appeared at least twice across different cone morphological types for a given species. † designations indicate  $\lambda_{\max}$  values for which cone morphological type had not been identified. § indicate  $\lambda_{\max}$  values that are associated with a rare morphological ‘triple’ cone type. ‡ indicate species whose synonymized names are listed in the published phylogeny (Rabosky, 2013). Species listed without ecological assignments had adult spectral sensitivity data available, but were not present in the phylogeny. See supplemental .xls file.

[Click here to Download Table S1](#)

**Table S2.** Cone  $\lambda_{\max}$  (nm) averages across morphological types of cones and levels of chromacy for the 213 species included in analysis. In cases where  $\lambda_{\max}$  values were associated with two or more morphological types in a given retina, cone  $\lambda_{\max}$  were assigned as “mixed.”

| <i>Cone Morphological Type</i> | Mean Cone $\lambda_{\max}$ (nm) $\pm$ s.d. |
|--------------------------------|--------------------------------------------|
| Single                         | 455 $\pm$ 50                               |
| Double                         | 532 $\pm$ 34                               |
| Twin                           | 529 $\pm$ 27                               |
| Mixed                          | 532 $\pm$ 39                               |
| <i>Chromacy Level</i>          |                                            |
| Monochromacy                   | 496 $\pm$ 37                               |
| Dichromacy                     | 494 $\pm$ 49                               |
| Trichromacy                    | 505 $\pm$ 54                               |
| Tetrachromacy                  | 496 $\pm$ 59                               |
| Pentachromacy                  | 496 $\pm$ 70                               |

**Table S3.** Summary of the MCMC chains from the multivariate phylogenetic latent liability models produced in BEAST.

| Chain  | Phylogeny | Steps (x10 <sup>6</sup> ) | Samples | Samples (Post burn-in) | MPSRF    | Log Marginal Likelihood |
|--------|-----------|---------------------------|---------|------------------------|----------|-------------------------|
| 1      | normal    | 200                       | 20000   | 18000                  | 1.010798 | -2981.03                |
| 2      | normal    | 200                       | 20000   | 18000                  |          | -3224.91                |
| 3      | normal    | 200                       | 20000   | 18000                  |          | -3125.70                |
| 4      | normal    | 200                       | 20000   | 18000                  |          | -3100.92                |
| merged | normal    | 800                       | 80000   | 72000                  | N/A      | -2957.76                |
| 5      | star      | 200                       | 20000   | 18000                  | 1.001739 | -3546.85                |
| 6      | star      | 200                       | 20000   | 18000                  |          | -3563.12                |
| 7      | star      | 200                       | 20000   | 18000                  |          | -3588.41                |
| 8      | star      | 200                       | 20000   | 18000                  |          | -3294.80                |
| merged | star      | 800                       | 80000   | 72000                  | N/A      | -3303.40                |

**Table S4.** Pairwise Bayes factors analysis of model likelihood.

|                      | Chain 1 | Chain 2 | Chain 3 | Chain 4 | Merged (normal) |
|----------------------|---------|---------|---------|---------|-----------------|
| <b>Chain 5</b>       | 565.8   | 321.9   | 421.2   | 445.9   | -               |
| <b>Chain 6</b>       | 582.1   | 338.2   | 437.4   | 462.2   | -               |
| <b>Chain 7</b>       | 607.4   | 363.5   | 462.7   | 487.5   | -               |
| <b>Chain 8</b>       | 313.8   | 69.9    | 169.1   | 193.9   | -               |
| <b>Merged (star)</b> | -       | -       | -       | -       | 345.6           |
